# Supplementary material
Source: Springer Nature journal article supplement (https://www.springermedizin.de/resource/supplementary/12885_2013_4249_MOESM2_ESM.pdf/9466148)
Supplement: MOESM2 [file 9466148]

## Additional file 2 as PDF

**Additional file 2 Table S1.** IDs of annotated genes (1037) obtained from the list of non-redundant model matches of predicted NKX3.1 targets within the human genome. The *TMPRSS2* gene ID is underlined on chromosome 21.

### Chromosome 1:

1441, 2899, 100133966, 400750, 10450, 728621, 84871, 11124, 4898, 5865, 51060, 79699, 6342, 51668, 23358, 8613, 1600, 205,729620, 79971, 57554,257194, 642098, 127255, 127253, 431707, 204962, 26289, 26009, 5737, 64123, 729779, 23266, 79739, 80135, 255631, 676, 7813, 58155, 126987, 55170, 4803, 6699, 6703, 83540, 729952, 22920, 51430, 9910, 57795, 400796, 85397, 1660, 116496, 5321, 339479, 51022, 79577, 343450, 54530, 400800, 23271, 134, 26254, 55733, 1063,55105, 5867,375061,440730, 57568, 1130,81469,441933

### Chromosome 2:

54221, 23040, 400941, 129607, 400945, 23369, 151325, 51232, 100131085, 64225, 8491, 100128590, 6546, 27436, 11036, 9378, 98,57223, 114800,7444,55120, 84141, 6936, 80059, 1496, 388965, 51652,100134301, 440871, 9451, 50802,650405, 100131408, 442028, 3899, 8809, 60482, 442038,402100, 84220, 729540,652919, 727747, 57628, 8886,728241, 129684, 2995, 100134031, 554226, 344148, 81615, 130013, 84083, 647012, 53353, 8942, 728773, 100133235, 391453, 56475, 114805, 151531, 55137, 2888, 6332, 643496, 27347, 4036, 29789, 220988, 91752, 285135, 401024, 55854, 165215,66037, 5334,4999,79800, 117583,8828,22868, 130749, 580,26154, 6508, 2043, 653773, 2181, 80309,55022, 100128709, 401037, 51281

### Chromosome 3:

27255, 152330, 9695, 2917, 401050, 9901, 100134121, 151651, 151648, 391518, 7325, 27303, 7048, 339896, 201595, 54918, 25827, 23122, 10015, 10777, 3680, 200844, 23024, 5067, 401076, 6092, 6091, 2632, 253559, 2042, 63899, 389137, 644063, 391556, 285220, 84319, 11259, 644444, 25890, 131368, 214, 9666, 401082, 389141, 90102, 285335, 728873, 152404, 9515, 6565,286676, 84303,60678, 256076,348808, 66000, 10274,646547,51163, 1360,116931, 170506, 344758, 4311,389168,730086, 389170, 151742, 6476, 22865, 93556, 2122, 22871,647212, 254827, 730168, 131118, 64108, 6750,4026, 2257, 151963,57110, 131583, 152002

### Chromosome 4:

644753, 391634, 952, 9982, 729006, 5860, 254251, 645174, 9353, 80333, 55296, 401123, 5099, 645716, 642305, 727819, 401124, 57495, 51088, 132789,2565, 10699,255130,23284, 644578,65008,80144,255119, 5593,5783,4299, 10144, 401145, 2895, 658, 4790, 1062, 6870, 51176, 3426,64579, 133022, 9348, 100131243, 57721, 2169, 8654,4085, 100128580, 166378,645762,57182, 646187, 57575, 729578, 54510, 23657, 3600, 8821, 2996, 285423, 166614, 55294, 6423,54798,5356, 2982, 2983, 1519, 646865, 9693, 56884, 55016, 50859, 91351, 23022, 51166, 442117, 80817, 3248, 11086, 2823, 60559, 7424, 285501, 728081, 728191, 55714, 4543

### Chromosome 5:

79192, 340094, 729506, 100128382, 50834, 134145, 1611, 1501, 10409, 285697, 391769, 1016, 728411, 1010, 391771,439936,100133463, 100131678, 1007, 729862, 100130803, 79925, 729,345557, 10884,348980, 133418,3670,3672,4724, 153129, 115827, 5144,79993,91942, 10283, 373,375449, 100129571, 653238, 170591, 8546,9456,

100129870, 7060, 23635,645079, 731042, 4208, 729011,441097, 83594, 9366, 91137, 85480, 814,324,3781,57556,728342, 340069, 51334, 57507, 65983, 2201, 28965, 337876, 3094, 56132, 56131, 9832, 2890, 9421, 23367, 6444, 285626, 147,27430, 728843, 6586, 54908, 30820, 2568, 64901, 153579

### **Chromosome 6:**

8899, 285780, 389365, 266553, 2651, 3720, 54901, 389370, 4276, 10866, 7629, 11329, 114781, 2739, 442213, 245915, 83741, 7021, 646517, 55227, 653, 81578, 667, 221336, 727842, 727798, 202559,100128610, 642443, 100128757, 728052, 55788, 135228, 1303, 3617,643281,3351, 134728, 100134204, 100131508, 728360, 9892, 22832, 9096,100127905, 643926, 6885,2045,79694,442236, 253714, 389419, 57531, 5550, 639, 85413, 442249, 728590, 221322, 5570, 154215, 3908, 93663, 2070, 6943, 167826, 100130476, 167838, 10370, 729070, 729076, 7402, 7957, 23345, 80177, 26575, 389435, 4988,51106,5340,4216,5071, 10846, 90632, 6196, 64094, 100132959

### **Chromosome 7:**

260341, 401296, 30010, 168741, 340268, 100134489, 221981, 54664, 2115, 57037, 9734, 222894, 221830, 56164,4852, 11112, 9805, 64224, 989, 11281, 8621, 5478, 94239,285877, 100129159, 100134659, 728416, 100133482, 100128613, 27320, 100134664, 442319, 7697,100134576, 26053, 9569, 5380, 641808, 9863, 10512, 100134557, 223117, 2913, 9988, 799, 10282, 1278,57001, 6863, 222234, 5649, 375612, 29969, 1080, 83992, 51691, 56311, 3751, 50833, 6561, 64753, 54927, 56829,57180,346547,140545

### **Chromosome 8:**

640, 10395, 23362, 4023, 6570, 100132107, 10863, 665, 79618, 642513, 100127894, 137107, 100133273, 203100, 56892, 79698, 54212, 137902, 9705, 4986,100129667, 157708,6101, 157503, 137695, 4067, 6224, 90362, 286187, 79848, 27067, 54968, 83690, 3174,79776,5569,51101, 138046, 441363, 85481, 8895, 168975, 4325,8767,441369, 79815, 3788,79977, 83988, 7201,84955, 93035, 27012, 114788, 728795, 7227, 8667, 401474, 441377, 4982, 10584, 594842, 100131552, 340359, 312,157638, 5462,728724, 100129525, 56169

### **Chromosome 9:**

9933, 5991, 26953, 90865, 90871, 5789, 4781, 158326, 729983, 100131640, 1993, 100129669, 79817, 158038, 401497, 5646,392309, 100130309, 100132851, 727745, 26149, 653114, 100133160,389741, 100132072, 642929, 100133021,441420, 100133312, 643630,728903, 100131538, 643792, 100131760, 442421, 392335, 548321, 84210, 220869, 23670, 645345, 7091, 347119, 7088, 55582, 60560,53358, 1164, 100132701, 4920, 401541, 11046,54886, 1539, 10592, 1620,55755,392392, 5082, 5090, 89853

### **Chromosome 10:**

727894, 728544, 389936, 644540, 9712, 83641, 84898, 57512, 91452, 220929, 8453, 8325, 91074, 441666, 100133130, 653129,728813, 338598, 100133189, 100134210, 55747, 653365, 728725, 399761, 644021, 399753, 55753, 8505, 653252, 653308, 29974, 5592, 65217, 11130,253430, 22891, 29119,56521,219690,219699, 132, 10718, 728027, 54462, 2894, 23063, 355, 9023,51196, 404033, 100127889, 8945, 79591, 22986, 114815, 150, 57678, 4892, 57700, 26033, 22841, 256536

### **Chromosome 11:**

645581, 338645, 63982, 159963, 387758, 627, 81930, 54765, 100129825, 100131023, 57689, 387761, 51144, 374393, 63901, 2352, 2348, 10825, 100129795, 7405, 51773, 26011,

220382, 8301, 143686, 143684, 8690, 53942, 7225,10413,79659,80310,2893, 100049615,  
399947, 4684, 6653, 399959, 390259, 3312,387820,2113,729305

**Chromosome 12:**

100129645, 894, 57103, 10635, 118426, 50865, 93164, 83445, 2012, 51071, 5139, 3709,  
636, 121512,144402, 1272, 196528, 51474, 51411, 4327, 84305, 91419, 121227,  
9194,338811, 23426, 55832, 56890, 5801, 8549, 29953, 100130268, 114882, 144455, 89795,  
160335,55117, 160418, 4254,728084, 1848,643153, 439916, 694, 574016, 574028,  
338809,732096, 121456, 56899, 121601, 6926, 100129020, 84530, 160777, 387890,  
2054,5901

**Chromosome 13:**

284232, 348021, 55269, 9365, 54937, 29880, 7223, 387921, 10186, 80183, 647262, 22862,  
81617, 2974, 115825, 144983, 10562, 100128485, 122183,341689, 100134278, 81550,  
144766, 5101,400141,57626, 10464, 4008,64062,10253,647313, 114798, 387939, 84189,  
100133947, 144776, 2262, 10082,55757,266722, 84899, 390423, 6555, 728183, 267012,  
23026, 8660

**Chromosome 14:**

440153, 387978, 5587, 9472, 64067, 161198, 283547, 145581, 645086, 23116, 732210,  
651787, 161357, 6235,9147, 122786, 54331, 57161, 54916, 9786, 51339, 440181, 23002,  
4331, 81537, 83544, 9517, 9369,1734, 145508, 730105,23768,55727,767564,767565,1735,  
145200,5891, 100131845,90925

**Chromosome 15:**

339010, 6638, 2562, 2567, 4948, 54893, 1139, 57099, 1133, 89978, 4212, 825, 6557,  
100130218, 2200, 9728, 9318, 645693, 256764, 64864, 8925, 26035, 123722, 123624,  
145978,4916,8826,64784

**Chromosome 16:**

54715, 10368, 5930, 27327, 9951, 162083, 6817, 728734, 400509, 64755, 51327, 386757,  
647591, 91807, 388272, 29117, 79068, 267,5432,390735,729217,54768,388289,441506,  
10428, 57687

**Chromosome 17:**

4991, 8390, 6368, 342574, 147184, 3859, 8405, 339209, 645173, 64122

**Chromosome 18:**

56651, 64863, 5797, 284222, 56907, 388468, 400858, 729863, 644669, 400645, 1823,  
374864, 56853, 647946, 641516, 6860, 26040, 8170,220134, 5596, 100130003, 284254,  
6925, 100134353, 9352, 5273,221241, 1005, 28513, 92126, 54495, 79839, 220164, 220158,  
147381,79863

**Chromosome 19:**

30817, 199777, 163223, 100131141, 727780, 7386, 284395, 9745, 57616, 22900, 163071,  
284370, 4849

**Chromosome 20:**

650, 54363, 56255, 23236, 728434, 728573, 5126, 57186, 55857, 284801, 400841, 140823,  
9584, 60625, 9935, 149699, 84969, 10955, 79716, 149775, 128611

**Chromosome 21:**

149992, 729501, 642460, 317754, 4685, 400860, 861, 6450, **7113 (TMFRSS2)**

**Chromosome 22:**

81061, 644768, 26080, 642633

**Chromosome X:**

412, 26609, 4281, 395, 6322, 10742, 6197, 22866, 139420, 439944, 11141, 1756, 645090, 442444, 392447, 286444, 8573, 80316, 4128, 79742, 392452, 158586, 7789, 55613, 55906, 53344, 646193, 546, 10800, 203430, 6451, 5456, 53336, 90316, 100130134, 140886, 392501, 401602, 100130919, 649076, 100130176, 9643, 26280, 84187, 392522, 55849, 154796, 286528, 11254, 653155, 90293, 65109, 7737, 2747, 2892, 10178, 100129520, 340578, 100130613, 139741, 399668, 203522, 9459, 286411, 51438, 441525, 494118, 84631, 2332, 158521, 2334, 8776, 83692, 1193, 7411

**Chromosome Y:**

438, 392501, 100101121, 8653, 7404, 22829, 140032, 159125

**Additional file 2 Table S2.** Input gene IDs (1-452) with gene symbols used in the GePS pathway analysis (www.genomatix.de) representing intronic, exonic and promoter matches for the NKX3.1 binding site model within the human genome.

| #  | Gene ID | Gene Symbol | 51  | 3617 | IMPG1         | 101 | 6342 | SCP2          | 151 | 9472  | AKAP6      | 201 | 23236 | PLCB1       |
|----|---------|-------------|-----|------|---------------|-----|------|---------------|-----|-------|------------|-----|-------|-------------|
| 1  | 98      | ACYP2       | 52  | 3680 | ITGA9         | 102 | 6368 | CCL23         | 152 | 9515  | STXBP5L    | 202 | 23266 | LPHN2       |
| 2  | 132     | ADK         | 53  | 3709 | ITPR2         | 103 | 6444 | SGCD          | 153 | 9517  | SPILC2     | 203 | 23271 | CAMSAP2     |
| 3  | 134     | ADORA1      | 54  | 3720 | JARID2        | 104 | 6450 | SH3BGR        | 154 | 9569  | GTF2IRD1   | 204 | 23284 | LPHN3       |
| 4  | 150     | ADRA2A      | 55  | 3751 | KCND2         | 105 | 6546 | SLC8A1        | 155 | 9666  | DZIP3      | 205 | 23362 | PSD3        |
| 5  | 205     | AK4         | 56  | 3899 | AFF3          | 106 | 6555 | SLC10A2       | 156 | 9712  | USP6NL     | 206 | 23369 | PUM2        |
| 6  | 267     | AMFR        | 57  | 3908 | LAMA2         | 107 | 6557 | SLC12A1/CTXN2 | 157 | 9734  | HDAC9      | 207 | 23635 | SSBP2       |
| 7  | 324     | GXL 1234159 | 58  | 4008 | LMO7/UCLH3    | 108 | 6638 | GXL 1337704   | 158 | 9786  | KIAA0586   | 208 | 23670 | TMEM2       |
| 8  | 373     | TRIM23      | 59  | 4026 | LPP           | 109 | 6699 | SPRR1B        | 159 | 9805  | SCRN1      | 209 | 23768 | FLRT2       |
| 9  | 395     | ARHGAP6     | 60  | 4036 | LRP2          | 110 | 6925 | TCF4          | 160 | 9832  | JAKMP2     | 210 | 25827 | FBXL2       |
| 10 | 438     | ASMT        | 61  | 4128 | MAOA          | 111 | 6926 | TBX3          | 161 | 9863  | MAGI2      | 211 | 25890 | ABI3BP      |
| 11 | 580     | BARD1       | 62  | 4212 | MEIS2         | 112 | 7060 | THBS4         | 162 | 9892  | SNAP91     | 212 | 26009 | ZZZ3        |
| 12 | 640     | BLK         | 63  | 4281 | MID1          | 113 | 7113 | TMPRSS2       | 163 | 9910  | RABGAP1L   | 213 | 26011 | ODZ4        |
| 13 | 658     | BMPR1B      | 64  | 4299 | AFF1          | 114 | 7223 | TRPC4         | 164 | 9933  | KIAA0020   | 214 | 26033 | ATRNL1      |
| 14 | 665     | BNIP3L      | 65  | 4331 | MNAT1/SLC38A6 | 115 | 7225 | TRPC6         | 165 | 9988  | DMTF1      | 215 | 26035 | GLCE        |
| 15 | 667     | DST         | 66  | 4543 | MTNRIA        | 116 | 7227 | TRP51         | 166 | 10082 | GPC6       | 216 | 26040 | SETBP1      |
| 16 | 676     | BRDT        | 67  | 4684 | NCAM1         | 117 | 7325 | UBE2E2        | 167 | 10144 | FAM13A     | 217 | 26154 | ABCA12      |
| 17 | 799     | CALCR       | 68  | 4724 | NDUFS4        | 118 | 7404 | UTY           | 168 | 10178 | ODZ1       | 218 | 26254 | OPTC        |
| 18 | 814     | CAMK4       | 69  | 4781 | NFIB          | 119 | 7405 | UVVRAG        | 169 | 10274 | STAG1      | 219 | 26280 | IL1RAPL2    |
| 19 | 825     | CAPN3/GANC  | 70  | 4790 | NFKB1         | 120 | 7411 | VBP1          | 170 | 10283 | CWC27      | 220 | 26289 | AK5         |
| 20 | 861     | RUNX1       | 71  | 4803 | NGF           | 121 | 7629 | ZNF76         | 171 | 10395 | DLC1       | 221 | 26375 | RGS17       |
| 21 | 1010    | CDH12       | 72  | 4849 | CNOT3         | 122 | 7697 | ZNF138        | 172 | 10413 | YAP1       | 222 | 27067 | GXL 1237600 |
| 22 | 1063    | CENPF       | 73  | 4892 | NRAP          | 123 | 7813 | EVI5          | 173 | 10428 | CFDP1      | 223 | 27255 | CNTN6       |
| 23 | 1080    | CFTR        | 74  | 4898 | NRD1          | 124 | 7957 | EPM2A         | 174 | 10450 | PPIE       | 224 | 27327 | TNRC6A      |
| 24 | 1130    | LYST        | 75  | 4948 | OCA2          | 125 | 8170 | SLC14A2       | 175 | 10464 | PIBF1      | 225 | 27347 | STK39       |
| 25 | 1133    | CHRM5       | 76  | 4999 | ORC2          | 126 | 8301 | PICALM        | 176 | 10635 | RAD51AP1   | 226 | 27436 | EML4        |
| 26 | 1139    | CHRNA7      | 77  | 5071 | PARK2         | 127 | 8405 | SPOP          | 177 | 10699 | CORIN      | 227 | 29117 | BRD7        |
| 27 | 1193    | CLIC2       | 78  | 5101 | PCDH9         | 128 | 8453 | CUL2          | 178 | 10955 | SERINC3    | 228 | 29119 | CTNNA3      |
| 28 | 1272    | CNTN1       | 79  | 5126 | PCSK2         | 129 | 8491 | MAP4K3        | 179 | 11036 | GXL 693729 | 229 | 29789 | OLA1        |
| 29 | 1303    | COL12A1     | 80  | 5139 | PDE3A         | 130 | 8505 | PARG          | 180 | 11046 | SLC35D2    | 230 | 29880 | ALG5        |
| 30 | 1360    | CPB1        | 81  | 5273 | SERPINB10     | 131 | 8546 | AP3B1         | 181 | 11112 | HIBADH     | 231 | 29953 | TRHDE/TPH2  |
| 31 | 1600    | DAB1/OMA1   | 82  | 5380 | PMS2L2        | 132 | 8549 | LGR5          | 182 | 11124 | FAF1       | 232 | 29969 | MDFIC       |
| 32 | 1756    | DMD         | 83  | 5432 | POLR2C/COQ9   | 133 | 8621 | CDK13         | 183 | 11141 | IL1RAPL1   | 233 | 30010 | NXPH1       |
| 33 | 1823    | DSC1        | 84  | 5570 | PKIB          | 134 | 8654 | PDE5A         | 184 | 11254 | SLC6A14    | 234 | 30817 | EMR2        |
| 34 | 2042    | EPHA3       | 85  | 5587 | PRKD1         | 135 | 8667 | EIF3H         | 185 | 11259 | FILIP1L    | 235 | 30820 | KCNIP1      |
| 35 | 2070    | EYA4        | 86  | 5592 | PRKG1         | 136 | 8809 | IL18R1/IL1RL1 | 186 | 11281 | POU6F2     | 236 | 50802 | IGK@        |
| 36 | 2115    | ETV1        | 87  | 5593 | PRKG2         | 137 | 8826 | IQGAP1        | 187 | 11329 | STK38      | 237 | 50859 | SPOCK3      |
| 37 | 2169    | FABP2       | 88  | 5646 | PRSS3         | 138 | 8895 | CPNE3         | 188 | 22829 | NLGN4Y     | 238 | 50865 | HEBP1       |
| 38 | 2257    | FGF12       | 89  | 5649 | RELN          | 139 | 8899 | PRPF4B        | 189 | 22841 | RAB11FIP2  | 239 | 51022 | GLRX2       |
| 39 | 2332    | FMR1        | 90  | 5737 | PTGFR         | 140 | 8925 | HERC1         | 190 | 22862 | FNDC3A     | 240 | 51071 | DERA        |
| 40 | 2562    | GABRB3      | 91  | 5783 | PTPN13        | 141 | 8945 | BTRC          | 191 | 22871 | NLGN1      | 241 | 51088 | KLHL5       |
| 41 | 2567    | GABRG3      | 92  | 5789 | PTPRD         | 142 | 9147 | NEMF          | 192 | 22891 | ZNF365     | 242 | 51106 | TFB1M       |
| 42 | 2651    | GCNT2       | 93  | 5797 | PTPRM         | 143 | 9348 | NDST3         | 193 | 22920 | KIFAP3     | 243 | 51144 | GXL 1223060 |
| 43 | 2890    | GRIA1       | 94  | 5801 | PTPRR         | 144 | 9353 | SLIT2         | 194 | 22986 | SORCS3     | 244 | 51163 | DBR1        |
| 44 | 2893    | GRIA4       | 95  | 5867 | RAB4A/SPHAR   | 145 | 9365 | KL            | 195 | 23022 | PALLD      | 245 | 51176 | LEF1        |
| 45 | 2894    | GRID1       | 96  | 5891 | MOK           | 146 | 9369 | NRXN3         | 196 | 23026 | MYO16      | 246 | 51196 | PLCE1       |
| 46 | 2895    | GRID2       | 97  | 5991 | REF3          | 147 | 9378 | NRXN1         | 197 | 23040 | MYTIL      | 247 | 51281 | ANKMY1      |
| 47 | 2917    | GRM7        | 98  | 6091 | ROBO1         | 148 | 9451 | EIF2AK3       | 198 | 23063 | WAPAL      | 248 | 51411 | BIN2        |
| 48 | 2974    | GUCY1B2     | 99  | 6196 | RPS6KA2       | 149 | 9456 | HOMER1        | 199 | 23116 | FAM179B    | 249 | 51430 | C1orf9      |
| 49 | 2996    | GYPE        | 100 | 6332 | SCN7A         | 150 | 9459 | ARHGEF6       | 200 | 23122 | CLASP2     | 250 | 51474 | LIMA1       |

|     |       |            |
|-----|-------|------------|
| 251 | 51652 | GXL 744663 |
| 252 | 51668 | HSPB11     |
| 253 | 51773 | RSF1       |
| 254 | 53344 | CHIC1      |
| 255 | 53942 | CNTN5      |
| 256 | 54221 | SNTG2      |
| 257 | 54530 | DENND1B    |
| 258 | 54715 | RBFOX1     |
| 259 | 54765 | TRIM44     |
| 260 | 54768 | HYDIN      |
| 261 | 54886 | LPPR1      |
| 262 | 54893 | MTMR10     |
| 263 | 54901 | CDKAL1     |
| 264 | 54916 | C14orf101  |
| 265 | 54918 | CMTM6      |
| 266 | 54927 | CHCHD3     |
| 267 | 54968 | TMEM70     |
| 268 | 55016 | 41334      |
| 269 | 55105 | GPATCH2    |
| 270 | 55120 | FANCL      |
| 271 | 55227 | LRRC1      |
| 272 | 55269 | PSPC1      |
| 273 | 55294 | FBXW7      |
| 274 | 55296 | TBC1D19    |
| 275 | 55582 | KIF27      |
| 276 | 55714 | ODZ3       |
| 277 | 55727 | BTBD7      |
| 278 | 55733 | HHAT       |
| 279 | 55753 | OGDHL      |
| 280 | 55788 | LMBRD1     |
| 281 | 56164 | STK31      |
| 282 | 56521 | DNAJC12    |
| 283 | 56829 | ZC3HAV1    |
| 284 | 56884 | FSTL5      |
| 285 | 56890 | MDM1       |
| 286 | 56899 | ANKS1B     |
| 287 | 56907 | SPIRE1     |
| 288 | 57037 | ANKMY2     |
| 289 | 57099 | AVEN       |
| 290 | 57161 | PELI2      |
| 291 | 57223 | SMEK2      |
| 292 | 57512 | GPR158     |
| 293 | 57554 | LRRC7      |
| 294 | 57568 | SIPA1L2    |
| 295 | 57575 | PCDH10     |
| 296 | 57626 | KLHL1      |
| 297 | 57628 | DPP10      |
| 298 | 57678 | GPAM       |
| 299 | 57687 | VATIL      |
| 300 | 57700 | FAM160B1   |

|     |       |          |
|-----|-------|----------|
| 301 | 58155 | PTBP2    |
| 302 | 60560 | NAA35    |
| 303 | 60678 | EEFSEC   |
| 304 | 63901 | FAM111A  |
| 305 | 64062 | RBM26    |
| 306 | 64067 | NPAS3    |
| 307 | 64122 | FN3K     |
| 308 | 64123 | ELTD1    |
| 309 | 64225 | ATL2     |
| 310 | 64753 | CCDC136  |
| 311 | 64784 | CRTC3    |
| 312 | 64864 | RFX7     |
| 313 | 65008 | MRPL1    |
| 314 | 65217 | PCDH15   |
| 315 | 79068 | FTO      |
| 316 | 79591 | C10orf76 |
| 317 | 79618 | HMBOX1   |
| 318 | 79659 | DYNC2H1  |
| 319 | 79699 | ZYG11B   |
| 320 | 79776 | ZFHX4    |
| 321 | 79800 | ALS2CR8  |
| 322 | 79817 | MOB3B    |
| 323 | 79839 | CCDC102B |
| 324 | 79848 | CSPP1    |
| 325 | 79863 | RBFA     |
| 326 | 79925 | SPEF2    |
| 327 | 79971 | WLS      |
| 328 | 79977 | GRHL2    |
| 329 | 79993 | ELOVL7   |
| 330 | 80135 | RPF1     |
| 331 | 80144 | FRAS1    |
| 332 | 80310 | PDGFD    |
| 333 | 80333 | KCNIP4   |
| 334 | 81537 | SGPP1    |
| 335 | 81550 | TDRD3    |
| 336 | 81617 | CAB39L   |
| 337 | 83544 | DNAL1    |
| 338 | 83641 | FAM107B  |
| 339 | 83988 | NCALD    |
| 340 | 84083 | ZRANB3   |
| 341 | 84141 | FAM176A  |
| 342 | 84187 | TMEM164  |
| 343 | 84303 | CHCHD6   |
| 344 | 84305 | WIBG     |
| 345 | 84319 | C3orf26  |
| 346 | 84530 | SRRM4    |
| 347 | 84871 | AGBL4    |
| 348 | 84898 | PLXDC2   |
| 349 | 84899 | TMTC4    |
| 350 | 85413 | SLC22A16 |

|     |        |                  |
|-----|--------|------------------|
| 351 | 89978  | ATPBD4           |
| 352 | 90102  | PHLDB2, PLCXD2   |
| 353 | 90362  | FAM110B          |
| 354 | 91351  | DDX60L           |
| 355 | 91452  | ACBD5            |
| 356 | 91942  | NDUFAF2          |
| 357 | 93035  | PKHD1L1          |
| 358 | 93164  | HTR7P1           |
| 359 | 93663  | ARHGAP18/TMEM244 |
| 360 | 114788 | CSMD3            |
| 361 | 114815 | SORCS1           |
| 362 | 114882 | OSBPL8           |
| 363 | 115825 | WDFY2            |
| 364 | 116496 | FAM129A          |
| 365 | 116931 | MED12L           |
| 366 | 118426 | LOH12CR1         |
| 367 | 121512 | FGD4             |
| 368 | 121601 | ANO4             |
| 369 | 123624 | AGBL1            |
| 370 | 123722 | FSD2             |
| 371 | 128611 | ZNF831           |
| 372 | 131118 | DNAJC19          |
| 373 | 135228 | CD109            |
| 374 | 138046 | RALYL            |
| 375 | 140545 | RNF32            |
| 376 | 144402 | CPNE8            |
| 377 | 144766 | LINC00355        |
| 378 | 144983 | HNRNPAIL2        |
| 379 | 151531 | UPP2             |
| 380 | 151651 | EFHB             |
| 381 | 151742 | PPM1L            |
| 382 | 152330 | CNTN4            |
| 383 | 153129 | SLC38A9          |
| 384 | 153579 | BTNL9            |
| 385 | 154215 | NKAIN2           |
| 386 | 158038 | LINGO2           |
| 387 | 158326 | FREM1            |
| 388 | 160335 | TMTC2            |
| 389 | 161357 | MDGA2            |
| 390 | 163223 | ZNF99/ZNF676     |
| 391 | 165215 | FAM171B          |
| 392 | 166378 | SPATA5           |
| 393 | 168975 | CNBD1            |
| 394 | 170506 | DHX36            |
| 395 | 170591 | S100Z            |
| 396 | 196528 | ARID2            |
| 397 | 199777 | ZNF626           |
| 398 | 200844 | C3orf67          |
| 399 | 202559 | KHDRBS2          |
| 400 | 203100 | HTRA4            |

|     |           |               |
|-----|-----------|---------------|
| 401 | 204962    | SLC44A5       |
| 402 | 220164    | DOK6          |
| 403 | 220929    | ZNF438        |
| 404 | 221322    | C6orf170      |
| 405 | 221336    | BEND6         |
| 406 | 222234    | FAM185A       |
| 407 | 223117    | SEMA3D        |
| 408 | 253714    | MMS22L        |
| 409 | 255119    | FGF5/C4orf22  |
| 410 | 255631    | COL24A1       |
| 411 | 256076    | COL6A5        |
| 412 | 256536    | TCERG1L       |
| 413 | 257194    | NEGR1         |
| 414 | 284222    | PIEZO2        |
| 415 | 285335    | SLC9C1        |
| 416 | 285780    | LY86-AS1      |
| 417 | 286187    | COPS5/PPP1R42 |
| 418 | 286411    | RP1-177G6.2   |
| 419 | 338645    | LUZP2         |
| 420 | 339010    | POTEB         |
| 421 | 339479    | FAM5C         |
| 422 | 342574    | KRT27         |
| 423 | 344148    | NCKAP5        |
| 424 | 348980    | HCN1          |
| 425 | 374393    | FAM111B       |
| 426 | 374864    | C18orf34      |
| 427 | 375449    | MAST4         |
| 428 | 375612    | LHFPL3        |
| 429 | 389170    | LEKR1         |
| 430 | 399761    | BMS1P5        |
| 431 | 400509    | SNX29P1       |
| 432 | 400800    | FLJ43585      |
| 433 | 400945    | FLJ41481      |
| 434 | 401050    | LOC100288428  |
| 435 | 401145    | FAM190A       |
| 436 | 401541    | CENPP         |
| 437 | 404033    | GXL 1222485   |
| 438 | 439936    | C5orf17       |
| 439 | 440153    | OR11H12       |
| 440 | 441369    | FLJ46284      |
| 441 | 441666    | LOC441666     |
| 442 | 442028    | LOC442028     |
| 443 | 442213    | PTCHD4        |
| 444 | 442319    | ZNF727        |
| 445 | 644444    | TMEM30C       |
| 446 | 647946    | LOC647946     |
| 447 | 653238    | GTF2H2B       |
| 448 | 653252    | GXL 1336332   |
| 449 | 728411    | GUSBP1        |
| 450 | 728621    | CCDC30        |
| 451 | 100127889 | ENTPD1        |
| 452 | 100128590 | LOC100128590  |
